# Supplementary figures and images for: Increase in Blood‐Brain Barrier (BBB) Permeability Is Regulated by MMP3 via the ERK Signaling Pathway
Source: Hindawi journal article supplement (doi:10.1155/2021/6655122), 2021-01-01

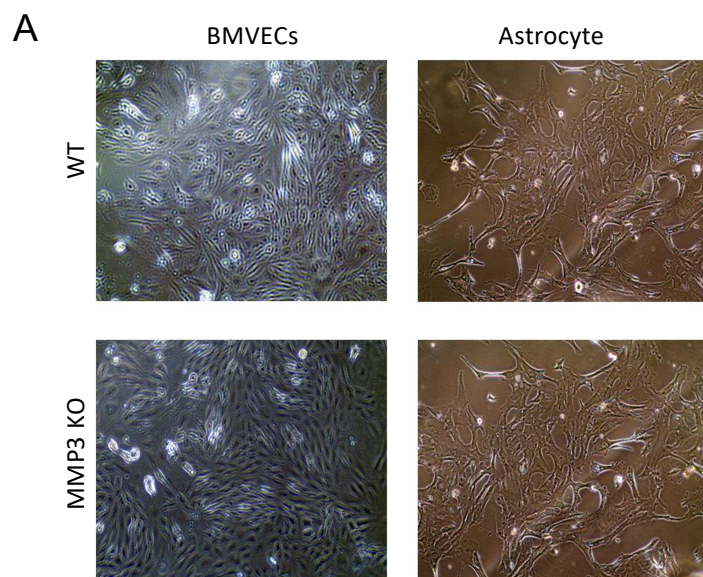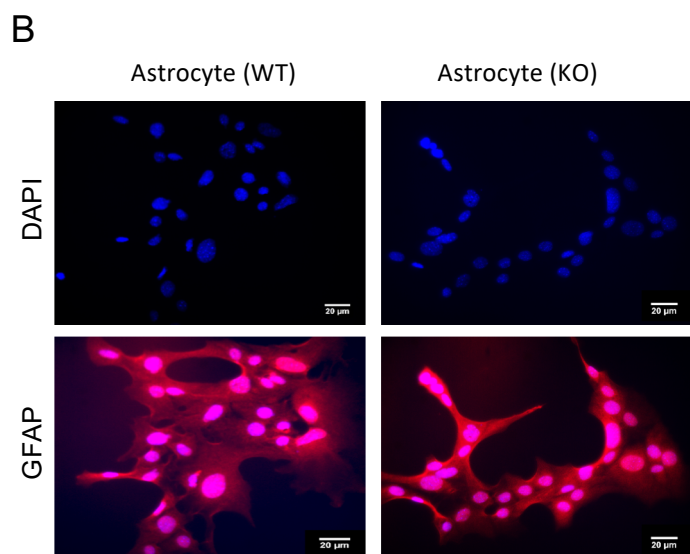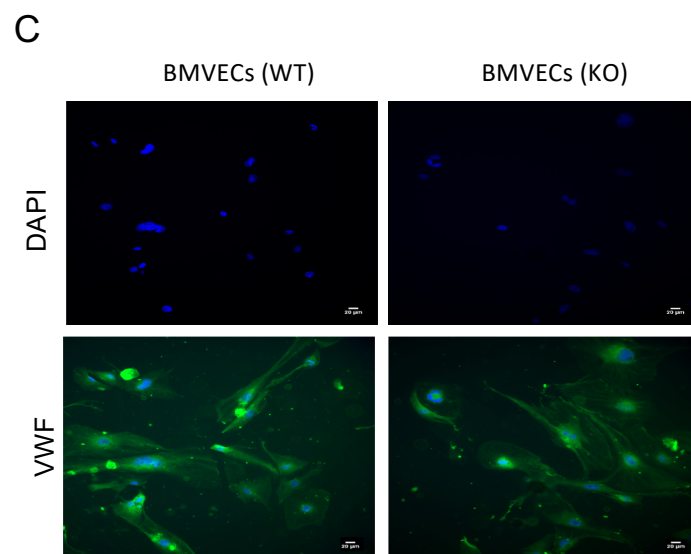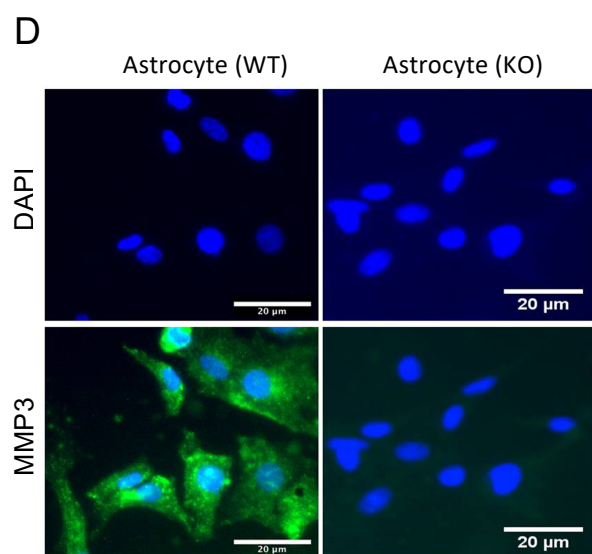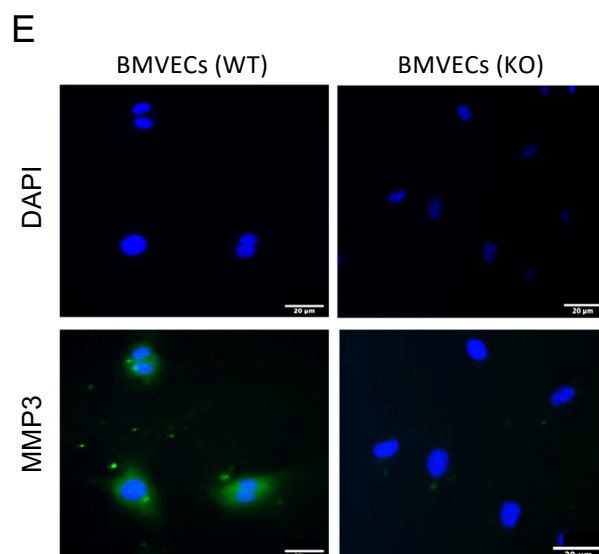

Supplemental figure 1

Supplement: f1 [file 6655122.f1.zip]
